# Supplementary material
Source: PubMed Central journal article supplement (PMC8050603)
Supplement: mmc1.pdf [file mmc1.pdf]

# R code documentation Covid - Chile Food Anxiety - Appetite paper

Gabriel Gonzalez Medina

12-01-2021

## Preparing data

### Importing

```
library(dplyr)
```

```
## Warning: package 'dplyr' was built under R version 3.6.3
```

```
library(readxl)
```

### Import excel (from google forms) raw data

```
covid_base_Chile <- read_excel("C:/Users/ggonzalezm/Desktop/Centro investigación UDLA Nutri-Psico/COVID  
col_names = FALSE)
```

```
## New names:  
## * ' -> ...1  
## * ' -> ...2  
## * ' -> ...3  
## * ' -> ...4  
## * ' -> ...5  
## * ...
```

```
glimpse(covid_base_Chile)
```

```
## Rows: 1,795  
## Columns: 71  
## $ ...1 <chr> "ID", "Marca temporal", "43924.459642152782", "43924.45973899...  
## $ ...2 <chr> "v1", "¿Desea seguir participando del estudio?", "Si", "Si", ...  
## $ ...3 <chr> "v2", "Usted en la actualidad ¿está realizando algún tipo de ...  
## $ ...4 <chr> "v3", "¿Cuánto tiempo lleva en \"cuarentena\" o medida de ais...  
## $ ...5 <chr> "v4", "¿Ha estado en contacto con alguna persona confirmada p...  
## $ ...6 <chr> "v5", "¿Tiene ud. diagnóstico confirmado de Covid-19?", "No",...  
## $ ...7 <chr> "v6", "¿Cuál es tu género?", "Masculino", "Masculino", "Mascu...  
## $ ...8 <chr> "v7", "Edad", "23", "23", "51", "23", "41", "44", "52", "45",...
```

## \$ ...9 <chr> "v8", "Nacionalidad", "Chilena", "Chilena", "Chilena", "Chile...  
## \$ ...10 <chr> "v9", "Su nivel más alto de escolaridad es", "Universitaria ...  
## \$ ...11 <chr> "v10", "En ámbito ocupacional, Ud. es", "Trabajador independi...  
## \$ ...12 <chr> "v11", "¿Cuál es la región donde usted reside?", "VIII región...  
## \$ ...13 <chr> "v12", "Considerando que un hogar se compone por personas que...  
## \$ ...14 <chr> "v13", "¿A cuál nivel socioeconómico cree Ud. que pertenece?"...  
## \$ ...15 <chr> "v14", "Toma bebidas gaseosas o néctares comerciales o jugos ...  
## \$ ...16 <chr> "v15", "Consume lácteos", "2 porciones al día", "2 porciones ...  
## \$ ...17 <chr> "v16", "¿Consume frutas?", "Menos de 1 porción día", "Menos d...  
## \$ ...18 <chr> "v17", "¿Consume verduras? (crudas o cocidas)", "1/2 porción ...  
## \$ ...19 <chr> "v18", "¿Consume pan? (hallulla o marraqueta/francés/batido/p...  
## \$ ...20 <chr> "v19", "¿Consume galletas, queques, pasteles y/o dulces o eq...  
## \$ ...21 <chr> "v20", "Consume Huevos", "1 vez por semana", "1 vez por seman...  
## \$ ...22 <chr> "v21", "¿Consume vacuno, pollo, pavo o pescado?", "3 o más ve...  
## \$ ...23 <chr> "v22", "¿Consume legumbres? (porotos, lentejas, arvejas, garb...  
## \$ ...24 <chr> "v23", "¿Consume Café y/o Bebidas Energéticas?", "2 tazas y/o...  
## \$ ...25 <chr> "v24", "Consume bebidas alcohólicas", "Menos de 1 vaso al día...  
## \$ ...26 <chr> "v25", "Consume frituras", "2 porciones por semana", "2 porci...  
## \$ ...27 <chr> "v26", "Consume alimentos chatarra (pizza, completos, hamburg...  
## \$ ...28 <chr> "v27", "Usted toma desayuno", "Todos los días", "Todos los dí...  
## \$ ...29 <chr> "v28", "¿Ha variado el tamaño de la porción, en el consumo de...  
## \$ ...30 <chr> "v29", "¿Qué alimentos aumentaron su consumo?", NA, NA, NA, N...  
## \$ ...31 <chr> "v30", "¿Qué alimentos disminuyeron su consumo?", "Pan, Sopai...  
## \$ ...32 <chr> "v31", "¿Ha cambiado el tipo de alimentos que consume desde l...  
## \$ ...33 <chr> "v32", "¿Qué alimentos ha incorporado a su alimentación duran...  
## \$ ...34 <chr> "v33", "¿Desde la cuarentena, ud. ha percibido algún cambio e...  
## \$ ...35 <chr> "v34", "[Disfruto de mi programa favorito de radio o TV]", "D...  
## \$ ...36 <chr> "v35", "[Disfruto estar con mi familia o amigos]", "De acuerd...  
## \$ ...37 <chr> "v36", "[Disfruto mis pasatiempos]", "De acuerdo", "De acuerd...  
## \$ ...38 <chr> "v37", "[Disfruto de mi comida favorita]", "De acuerdo", "De ...  
## \$ ...39 <chr> "v38", "[Disfruto de un baño caliente o refrescante]", "De ac...  
## \$ ...40 <chr> "v39", "[Me causa placer percibir el aroma de las flores, de ...  
## \$ ...41 <chr> "v40", "[Disfruto ver a otras personas reír]", "De acuerdo", ...  
## \$ ...42 <chr> "v41", "[Disfruto verme bien cuando trato de cuidar mi aparie...  
## \$ ...43 <chr> "v42", "[Disfruto leer un libro, una revista o el diario]", "...  
## \$ ...44 <chr> "v43", "[Me resulta muy agradable el tomar una taza de café, ...  
## \$ ...45 <chr> "v44", "[Me produce placer el fijarme en pequeños detalles co...  
## \$ ...46 <chr> "v45", "[Disfruto un paisaje o una vista hermosa]", "Totalmen...  
## \$ ...47 <chr> "v46", "[Disfruto el poder ayudar a otros]", "De acuerdo", "D...  
## \$ ...48 <chr> "v47", "[Disfruto cuando otras personas me halagan]", "De acu...  
## \$ ...49 <chr> "v48", "[Torpe o paralizado]", "Nada, en absoluto", "Nada, en...  
## \$ ...50 <chr> "v49", ". [Acalorado]", "Levemente, no me molesta mucho", "Le...  
## \$ ...51 <chr> "v50", ". [Con temblor en las piernas]", "Nada, en absoluto",...  
## \$ ...52 <chr> "v51", ". [Incapaz de relajarse]", "Levemente, no me molesta ...  
## \$ ...53 <chr> "v52", ". [Con temor a que ocurra lo peor]", "Moderadamente f...  
## \$ ...54 <chr> "v53", ". [Mareado, o que se le va la cabeza]", "Nada, en abs...  
## \$ ...55 <chr> "v54", ". [Con latidos del corazón fuertes y acelerados]", "N...  
## \$ ...56 <chr> "v55", ". [Inestable]", "Nada, en absoluto", "Nada, en absolu...  
## \$ ...57 <chr> "v56", ". [Atemorizado o asustado]", "Nada, en absoluto", "Na...  
## \$ ...58 <chr> "v57", ". [Nervioso]", "Levemente, no me molesta mucho", "Lev...  
## \$ ...59 <chr> "v58", ". [Con sensación de bloqueo]", "Nada, en absoluto", "...  
## \$ ...60 <chr> "v59", ". [Con temblores en las manos]", "Nada, en absoluto",...  
## \$ ...61 <chr> "v60", ". [Inquieto, inseguro]", "Levemente, no me molesta mu...  
## \$ ...62 <chr> "v61", ". [Con miedo a perder el control]", "Nada, en absolut...

```
## $ ...63 <chr> "v62", ". [Con sensación de ahogo]", "Nada, en absoluto", "Na...
## $ ...64 <chr> "v63", ". [Con temor a morir]", "Nada, en absoluto", "Nada, e...
## $ ...65 <chr> "v64", ". [Con miedo]", "Moderadamente fue muy desagradable, ...
## $ ...66 <chr> "v65", ". [Con problemas digestivos]", "Nada, en absoluto", "...
## $ ...67 <chr> "v66", ". [Con desvanecimiento]", "Nada, en absoluto", "Nada,...
## $ ...68 <chr> "v67", ". [Con enrojecimiento facial]", "Nada, en absoluto", ...
## $ ...69 <chr> "v68", ". [Con sudores fríos o calientes]", "Nada, en absolut...
## $ ...70 <chr> "v69", "¿Desea invitar a un familiar o conocido a contestar e...
## $ ...71 <chr> "v70", "Email de sus familiares o de personas conocidas", NA,...
```

Removing the first rows, because they do not have observations

```
dat <- covid_base_Chile[-1:-2, ]
glimpse(dat)
```

```
## Rows: 1,793
## Columns: 71
## $ ...1 <chr> "43924.459642152782", "43924.459738993057", "43924.4619147916...
## $ ...2 <chr> "Si", "...
## $ ...3 <chr> "Voluntaria", "Voluntaria", "Voluntaria", "Voluntaria", "Volu...
## $ ...4 <chr> "Más de 1 semana", "Más de 1 semana", "Más de 2 semanas", "Má...
## $ ...5 <chr> "No", N...
## $ ...6 <chr> "No", N...
## $ ...7 <chr> "Masculino", "Masculino", "Masculino", "Masculino", "Femenino...
## $ ...8 <chr> "23", "23", "51", "23", "41", "44", "52", "45", "35", "45", N...
## $ ...9 <chr> "Chilena", "Chilena", "Chilena", "Chilena", "Chilena", "Chile...
## $ ...10 <chr> "Universitaria o Técnica Completa", "Universitaria o Técnic...
## $ ...11 <chr> "Trabajador independiente", "Trabajador independiente", "Trab...
## $ ...12 <chr> "VIII región del Bio-bio", "VIII región del Bio-bio", "XIII R...
## $ ...13 <chr> ">= 4", ">= 4", "2", ">= 4", ">= 4", "2", "2", "2", "2", ">= ...
## $ ...14 <chr> "Media baja", "Media baja", "Bajo", "Media baja", "Media alta...
## $ ...15 <chr> "1 vaso al día", "1 vaso al día", "No consume", "1 vaso al dí...
## $ ...16 <chr> "2 porciones al día", "2 porciones al día", "3 porciones al d...
## $ ...17 <chr> "Menos de 1 porción día", "Menos de 1 porción día", "3 porcio...
## $ ...18 <chr> "1/2 porción al día", "1/2 porción al día", "2 o más porcione...
## $ ...19 <chr> "2 porciones al día", "2 porciones al día", "2 porciones al d...
## $ ...20 <chr> "1 porción al día", "1 porción al día", "Menos de 1 vez al dí...
## $ ...21 <chr> "1 vez por semana", "1 vez por semana", "3 o más veces por se...
## $ ...22 <chr> "3 o más veces por semana", "3 o más veces por semana", "3 o ...
## $ ...23 <chr> "Menos de 1 vez por semana", "Menos de 1 vez por semana", "3 ...
## $ ...24 <chr> "2 tazas y/o vasos al día", "2 tazas y/o vasos al día", "1 ta...
## $ ...25 <chr> "Menos de 1 vaso al día ocasionalmente", "Menos de 1 vaso al ...
## $ ...26 <chr> "2 porciones por semana", "2 porciones por semana", "1 porció...
## $ ...27 <chr> "1 porción al día", "1 porción al día", "Menos de 1 vez al dí...
## $ ...28 <chr> "Todos los días", "Todos los días", "Todos los días", "Todos ...
## $ ...29 <chr> "Sí, disminuyó", "Sí, disminuyó", "Sí, disminuyó", "Sí, dismi...
## $ ...30 <chr> NA, NA, NA, NA, NA, "Chocolates, Pasteles, berlines, bollería...
## $ ...31 <chr> "Pan, Sopaipillas, Carnes, pescados y mariscos, Dulces, galle...
## $ ...32 <chr> "Sí", "Sí", "Sí", "Sí", "Sí", "Sí", "Sí", "Sí", "NO", "Sí", N...
## $ ...33 <chr> "Cereales", "Cereales", "pan hecho en casa", "Cereales", "Nad...
## $ ...34 <chr> "Sí, disminuyó", "Sí, disminuyó", "Sí, aumentó", "Sí, disminu...
## $ ...35 <chr> "De acuerdo", "De acuerdo", "De acuerdo", "De acuerdo", "De a...
## $ ...36 <chr> "De acuerdo", "De acuerdo", "Totalmente de acuerdo", "De acue..."
```

```
## $ ...37 <chr> "De acuerdo", "De acuerdo", "Totalmente de acuerdo", "De acue...
## $ ...38 <chr> "De acuerdo", "De acuerdo", "De acuerdo", "De acuerdo", "De a...
## $ ...39 <chr> "De acuerdo", "De acuerdo", "En desacuerdo", "De acuerdo", "D...
## $ ...40 <chr> "De acuerdo", "De acuerdo", "Totalmente de acuerdo", "De acue...
## $ ...41 <chr> "De acuerdo", "De acuerdo", "Totalmente de acuerdo", "De acue...
## $ ...42 <chr> "De acuerdo", "De acuerdo", "Totalmente de acuerdo", "De acue...
## $ ...43 <chr> "De acuerdo", "De acuerdo", "Totalmente de acuerdo", "De acue...
## $ ...44 <chr> "De acuerdo", "De acuerdo", "Totalmente de acuerdo", "De acue...
## $ ...45 <chr> "En desacuerdo", "En desacuerdo", "Totalmente de acuerdo", "D...
## $ ...46 <chr> "Totalmente de acuerdo", "Totalmente de acuerdo", "Totalmente...
## $ ...47 <chr> "De acuerdo", "De acuerdo", "Totalmente de acuerdo", "De acue...
## $ ...48 <chr> "De acuerdo", "De acuerdo", "Totalmente de acuerdo", "De acue...
## $ ...49 <chr> "Nada, en absoluto", "Nada, en absoluto", "Nada, en absoluto"...
## $ ...50 <chr> "Levemente, no me molesta mucho", "Levemente, no me molesta m...
## $ ...51 <chr> "Nada, en absoluto", "Nada, en absoluto", "Nada, en absoluto"...
## $ ...52 <chr> "Levemente, no me molesta mucho", "Levemente, no me molesta m...
## $ ...53 <chr> "Moderadamente fue muy desagradable, pero podía soportarlo", ...
## $ ...54 <chr> "Nada, en absoluto", "Nada, en absoluto", "Nada, en absoluto"...
## $ ...55 <chr> "Nada, en absoluto", "Nada, en absoluto", "Nada, en absoluto"...
## $ ...56 <chr> "Nada, en absoluto", "Nada, en absoluto", "Nada, en absoluto"...
## $ ...57 <chr> "Nada, en absoluto", "Nada, en absoluto", "Severamente, casi ...
## $ ...58 <chr> "Levemente, no me molesta mucho", "Levemente, no me molesta m...
## $ ...59 <chr> "Nada, en absoluto", "Nada, en absoluto", "Moderadamente fue ...
## $ ...60 <chr> "Nada, en absoluto", "Nada, en absoluto", "Nada, en absoluto"...
## $ ...61 <chr> "Levemente, no me molesta mucho", "Levemente, no me molesta m...
## $ ...62 <chr> "Nada, en absoluto", "Nada, en absoluto", "Severamente, casi ...
## $ ...63 <chr> "Nada, en absoluto", "Nada, en absoluto", "Nada, en absoluto"...
## $ ...64 <chr> "Nada, en absoluto", "Nada, en absoluto", "Nada, en absoluto"...
## $ ...65 <chr> "Moderadamente fue muy desagradable, pero podía soportarlo", ...
## $ ...66 <chr> "Nada, en absoluto", "Nada, en absoluto", "Severamente, casi ...
## $ ...67 <chr> "Nada, en absoluto", "Nada, en absoluto", "Nada, en absoluto"...
## $ ...68 <chr> "Nada, en absoluto", "Nada, en absoluto", "Nada, en absoluto"...
## $ ...69 <chr> "Nada, en absoluto", "Nada, en absoluto", "Nada, en absoluto"...
## $ ...70 <chr> "No", "No", "Si", "No", "Si", "Si", "No", "No", "Si", "No", N...
## $ ...71 <chr> NA, NA, "ps.juanpablo@gmail.com", NA, "Francisco.orellana.veg..."
```

## Recoding Variables

### Psychologicals variables

#### BAI Anxiety

BAI anxiety 49 to 69 in dat

Create recode function to BAI (Beck anxiety inventory)

```
rec_bai <- function(x){
  dplyr::recode(x,
    "Nada, en absoluto" = 0,
    "Levemente, no me molesta mucho" = 1,
    "Moderadamente fue muy desagradable, pero podía soportarlo" = 2,
    "Severamente, casi no podía soportarlo" = 3,
  )
}
```

Select BAI items and apply rec\_bai function

```
b_items <- sapply(dat %>% select(...49:...69), rec_bai)
```

Move recoded bai items to full data.

```
bdat <- cbind.data.frame(dat, b_items)
```

Put name to recoded bai items

```
names(bdat)[72:92] <- c('bai1', 'bai2', 'bai3', 'bai4', 'bai5', 'bai6',  
  'bai7', 'bai8', 'bai9', 'bai10', 'bai11', 'bai12',  
  'bai13', 'bai14', 'bai15', 'bai16', 'bai17',  
  'bai18', 'bai19', 'bai20', 'bai21')
```

Create list of all items

```
bai_items <- c('bai1', 'bai2', 'bai3', 'bai4', 'bai5', 'bai6',  
  'bai7', 'bai8', 'bai9', 'bai10', 'bai11', 'bai12', 'bai13',  
  'bai14', 'bai15', 'bai16', 'bai17', 'bai18', 'bai19',  
  'bai20', 'bai21')
```

Review coding is fine, comparing with original variable

```
table(bdat$...49, bdat$bai1)
```

```
##  
##  
##      0  1  2  3  
##  Levemente, no me molesta mucho      0 546  0  0  
##  Moderadamente fue muy desagradable, pero podía soportarlo  0  0 325  0  
##  Nada, en absoluto      822  0  0  0  
##  Severamente, casi no podía soportarlo      0  0  0 33
```

Calculate total score

```
bdat$bai_total <- rowSums(bdat[,bai_items], na.rm = TRUE)
```

## SHAPS Anhedonia

SHAPS anhedonia columns 35 to 48 in dat

recode function to SHAPS

```
rec_sh <- function(x){  
  dplyr::recode(x,  
    "Totalmente en desacuerdo" = 1,  
    "En desacuerdo"            = 1,  
    "De acuerdo"                = 0,  
    "Totalmente de acuerdo"    = 0,  
  )  
}
```

Select SHAPS items and apply rec\_sh function

```
sh_items <- sapply(dat %>% select(...35:...48), rec_sh)
```

Move recoded shaps items to full data.

```
bdat <- cbind.data.frame(bdat, sh_items)
```

Put names...

```
names(bdat)[94:107] <- c('sh1', 'sh2',  
                        'sh3', 'sh4', 'sh5', 'sh6', 'sh7',  
                        'sh8', 'sh9', 'sh10', 'sh11', 'sh12', 'sh13',  
                        'sh14')
```

Create list of SHAPS items

```
sh_items <- c('sh1', 'sh2',  
             'sh3', 'sh4', 'sh5', 'sh6', 'sh7',  
             'sh8', 'sh9', 'sh10', 'sh11', 'sh12', 'sh13',  
             'sh14')
```

Comparing old items with recoded

```
table(bdat$...35, bdat$sh1)
```

```
##  
##              0  1  
## De acuerdo      780  0  
## En desacuerdo    0 253  
## Totalmente de acuerdo  538  0  
## Totalmente en desacuerdo  0 155
```

Calculate SHAPS tota score

```
bdat$sh_total <- rowSums(bdat[,sh_items], na.rm =TRUE)
```

Items are ok recoded. Now to unify data frame name again.

```
dat <- bdat
```

transform psychological variables to categories

```
library(forcats)
```

BAI categories

```
dat <- dat %>%  
  mutate(bai_cat = ifelse(bai_total < 8, "Minimal",  
                          ifelse(bai_total %in% 8:15, "Mild",  
                                  ifelse(bai_total %in% 16:25, "Moderate",  
                                          "Severe"))))
```

order levels

```
dat$bai_cat <- factor(dat$bai_cat,  
                      levels = c("Minimal", "Mild", "Moderate", "Severe"))
```

SHAPS categories

```
dat <- dat %>%  
  mutate(sh_cat = ifelse(sh_total >= 3, "Yes", "No"))
```

order levels

```
dat$sh_cat <- factor(dat$sh_cat,  
                    levels = c("No", "Yes"))
```

## Food variables

---

Sweet drink

```
dat$sweet_drink <- factor(x = dat$...15)  
dat$sweet_drink <- dplyr::recode(dat$sweet_drink,  
                                "No consume" = "0",  
                                "Menos de 1 vaso al día ocasionalmente" = "<1",  
                                "1 vaso al día" = "1",  
                                "2 vasos al día" = "2",  
                                "3 o más vasos al día" = ">=3"  
)
```

Pastry

```
dat$pastry <- factor(x = dat$...20)  
dat$pastry <- dplyr::recode(dat$pastry,  
                            "No consume" = "0",  
                            "Menos de 1 vez al día ocasionalmente" = "< 1",  
                            "1 porción al día" = "1",  
                            "2 porciones al día" = "2",  
                            "3 o más porciones al día" = "=> 3"  
)  
  
dat$pastry <- factor(dat$pastry,  
                    levels = c("0", "< 1", "1", "2", "=> 3"))  
  
dat <- dat %>%  
  mutate(pastry_dic = fct_collapse(pastry,  
                                    "< 1" = c("0", "< 1"),  
                                    "1" = "1",  
                                    ">=2" = c("2", "=> 3"))  
)
```

Fried food

```

dat$frit <- factor(x= dat$...26)
dat$frit <- dplyr::recode(dat$frit,
  "No consume" = "0",
  "Ocasionalmente (2 veces al mes)" = "< 1",
  "1 porción por semana" = "1",
  "2 porciones por semana" = "2",
  "3 o más porciones por semana" = "=> 3"
)

dat$frit <- factor(dat$frit,
  levels = c("0", "< 1", "1", "2", "=> 3"))

dat <- dat %>%
  mutate(frit_dic = fct_collapse(frit,
    "<1" = c("0", "< 1"),
    "1" = "1",
    ">=2" = c("2", "=> 3"))
  )

```

Fast Food

```

dat$fast_food <- factor(x= dat$...27)
dat$fast_food <- dplyr::recode(dat$fast_food,
  "No consume" = "0",
  "Menos de 1 vez al día ocasionalmente" = "< 1",
  "1 porción al día" = "1",
  "2 porciones al día" = "2",
  "3 o más porciones al día" = "=> 3"
)

dat$fast_food <- factor(dat$fast_food,
  levels = c("0", "< 1", "1", "2", "=> 3"))

```

Food Size serving

```

dat$size_food <- factor(x= dat$...29)

dat$size_food <- dplyr::recode(dat$size_food,
  'Sí, disminuyó' = 'Decreased',
  'Si, aumentó' = 'Increased',
  'Se mantiene igual' = 'Same')

```

Transform size variable to binary outcome

```

dat$size <- factor(dat$size_food,
  levels = c("Same", "Increased"))

dat$inc.size <- (inc.size = dat$size == "Increased")

```

Weight perceived



```

dat$weigh_reported <- factor(x=dat$...34)

dat$weigh_reported <- dplyr::recode(dat$weigh_reported,
                                   'Sí, disminuyó' = 'Decreased',
                                   'Sí, aumentó' = 'Increased',
                                   'No. Se mantuvo igual' = 'Same')

```

Tranform to binary outcome

```

dat$weight <- factor(dat$weigh_reported,
                    levels = c("Same", "Increased"))

dat$inc.weight <- (inc.weight = dat$weigh_reported == "Increased")

```

## Sociodemographics

Lockdown

```

dat$Lockdown_time <- factor( x = dat$...4)

```

Gender

```

dat$gender <- factor( x = dat$...7, exclude = "Otro")
dat$gender <- factor( x = dat$gender,
                    levels = c("Femenino", "Masculino"),
                    labels = c("Feminine", "Masculine"))

```

Age

```

dat$age <- as.numeric(dat$...8)

```

Age groups

```

dat <- dat %>%
  mutate(age_group = ifelse(age %in% 18:29, "18 to 29",
                            ifelse(age %in% 30:59, "30 to 59",
                                    "60 or older")))

```

NSE

```

dat$NSE <- factor(x = dat$...14)
dat$NSE <- dplyr::recode(dat$NSE,
                        'Bajo' = 'Low',
                        'Media baja' = 'Middle-low',
                        'Media' = 'Middle',
                        'Media alta' = 'Middle-high',
                        'Alta' = 'High')

dat$NSE <- factor(dat$NSE,
                 levels = c('Low',

```

```
'Middle-low',
'Middle',
'Middle-high',
'High'))
```

## Accept participate

```
dat$accept <- as.factor(dat$...2)
table(dat$accept)
```

```
##
##   No   Si
##  15 1726
```

## Filtering base and drop unused variables

```
dat <- dat %>%
  filter(age > 17,
         age != " ",
         accept == "Si",
         gender != " ") %>%
  select(-starts_with("..."))

#eliminate duplicate cases by error in google forms

dat <- dat %>% distinct()

glimpse(dat)
```

```
## Rows: 1,696
## Columns: 57
## $ bai1      <dbl> 0, 0, 0, 0, 1, 0, 0, 0, 1, 0, 0, 1, 0, 0, 0, 2, 0, ...
## $ bai2      <dbl> 1, 0, 0, 0, 1, 1, 1, 0, 0, 1, 3, 2, 1, 0, 0, 2, 0, ...
## $ bai3      <dbl> 0, 0, 0, 0, 0, 0, 0, 0, 0, 0, 2, 0, 0, 0, 0, 0, 0, ...
## $ bai4      <dbl> 1, 1, 1, 0, 0, 0, 3, 1, 2, 2, 1, 3, 0, 2, 1, 2, 0, ...
## $ bai5      <dbl> 2, 2, 2, 1, 2, 2, 3, 1, 3, 2, 2, 1, 1, 1, 1, 2, 1, ...
## $ bai6      <dbl> 0, 0, 0, 0, 1, 0, 0, 0, 2, 2, 2, 2, 2, 0, 0, 0, 0, ...
## $ bai7      <dbl> 0, 0, 0, 0, 0, 0, 0, 0, 3, 2, 2, 1, 0, 0, 0, 0, 1, ...
## $ bai8      <dbl> 0, 0, 0, 0, 0, 1, 0, 1, 2, 1, 2, 2, 1, 0, 1, 1, 0, ...
## $ bai9      <dbl> 0, 3, 0, 0, 1, 1, 3, 0, 3, 0, 1, 1, 0, 0, 0, 1, 1, ...
## $ bai10     <dbl> 1, 2, 0, 1, 2, 0, 3, 1, 3, 2, 2, 2, 1, 1, 2, 1, 1, ...
## $ bai11     <dbl> 0, 2, 0, 0, 2, 0, 0, 0, 3, 0, 1, 0, 0, 0, 0, 1, 1, ...
## $ bai12     <dbl> 0, 0, 0, 0, 0, 0, 0, 0, 1, 1, 2, 0, 0, 0, 0, 0, 1, ...
## $ bai13     <dbl> 1, 3, 0, 1, 1, 0, 3, 1, 1, 1, 1, 1, 1, 0, 0, 0, 1, ...
## $ bai14     <dbl> 0, 3, 0, 1, 1, 0, 3, 0, 3, 1, 0, 1, 1, 0, 0, 1, 0, ...
## $ bai15     <dbl> 0, 0, 0, 0, 0, 0, 0, 0, 2, 0, 2, 1, 0, 0, 0, 1, 1, ...
## $ bai16     <dbl> 0, 0, 2, 0, 0, 0, 0, 0, 1, 0, 1, 1, 0, 0, 0, 1, 0, ...
## $ bai17     <dbl> 2, 3, 2, 1, 1, 0, 3, 0, 3, 1, 2, 0, 1, 0, 0, 1, 1, ...
```

```

## $ bai18      <dbl> 0, 3, 0, 1, 2, 0, 0, 0, 3, 1, 1, 3, 0, 0, 0, 0, 0, ...
## $ bai19      <dbl> 0, 0, 0, 0, 0, 0, 0, 0, 0, 1, 0, 1, 0, 0, 0, 0, 0, ...
## $ bai20      <dbl> 0, 0, 0, 0, 0, 0, 0, 0, 1, 0, 2, 1, 1, 0, 3, 0, 0, ...
## $ bai21      <dbl> 0, 0, 0, 0, 0, 0, 0, 0, 2, 0, 3, 0, 1, 0, 0, 0, 0, ...
## $ bai_total  <dbl> 8, 22, 7, 6, 15, 5, 22, 5, 40, 17, 33, 23, 11, 4, 8...
## $ sh1        <dbl> 0, 0, 0, 0, 0, 0, 0, 1, 0, 0, 0, 0, 0, 0, 0, 0, 0, ...
## $ sh2        <dbl> 0, 0, 0, 0, 0, 0, 0, 1, 0, 0, 0, 0, 0, 0, 0, 1, 0, ...
## $ sh3        <dbl> 0, 0, 0, 0, 1, 0, 1, 1, 0, 1, 0, 0, 0, 0, 0, 0, 0, ...
## $ sh4        <dbl> 0, 0, 0, 0, 1, 0, 1, 1, 0, 0, 0, 0, 0, 0, 0, 1, 0, ...
## $ sh5        <dbl> 0, 1, 0, 0, 1, 0, 1, 1, 0, 1, 0, 0, 0, 0, 0, 0, 0, ...
## $ sh6        <dbl> 0, 0, 0, 0, 1, 0, 1, 1, 0, 0, 0, 0, 0, 0, 0, 0, 0, ...
## $ sh7        <dbl> 0, 0, 0, 0, 1, 0, 1, 1, 0, 0, 0, 0, 0, 0, 0, 0, 0, ...
## $ sh8        <dbl> 0, 0, 0, 0, 1, 0, 1, 1, 0, 0, 0, 0, 0, 0, 0, 0, 0, ...
## $ sh9        <dbl> 0, 0, 0, 0, 1, 0, 0, 1, 0, 0, 0, 0, 0, 0, 0, 0, 0, ...
## $ sh10       <dbl> 0, 0, 0, 0, 1, 0, 1, 1, 0, 0, 0, 0, 0, 0, 0, 0, 0, ...
## $ sh11       <dbl> 1, 0, 0, 0, 0, 0, 0, 1, 0, 0, 0, 0, 0, 0, 0, 0, 0, ...
## $ sh12       <dbl> 0, 0, 0, 0, 1, 0, 1, 1, 0, 0, 0, 0, 0, 0, 0, 0, 0, ...
## $ sh13       <dbl> 0, 0, 0, 0, 0, 0, 1, 1, 0, 0, 0, 1, 0, 0, 0, 0, 0, ...
## $ sh14       <dbl> 0, 0, 0, 0, 0, 0, 0, 1, 0, 0, 0, 0, 0, 0, 0, 0, 0, ...
## $ sh_total   <dbl> 1, 1, 0, 0, 9, 0, 9, 14, 0, 2, 0, 1, 0, 0, 0, 2, 0,...
## $ bai_cat    <fct> Mild, Moderate, Minimal, Minimal, Mild, Minimal, Mo...
## $ sh_cat     <fct> No, No, No, No, Yes, No, Yes, Yes, No, No, No, No, ...
## $ sweet_drink <fct> 1, 0, 1, 2, <1, 0, 0, <1, <1, 0, 1, 0, 1, <1, 0, <1...
## $ pastry     <fct> 1, < 1, 1, < 1, 1, 1, 0, 0, < 1, < 1, 2, < 1, 1, 0,...
## $ pastry_dic <fct> 1, < 1, 1, < 1, 1, 1, < 1, < 1, < 1, < 1, >=2, < 1,...
## $ frit       <fct> 2, 1, < 1, < 1, 1, 0, < 1, < 1, 0, 1, 2, < 1, => 3,...
## $ frit_dic   <fct> >=2, 1, <1, <1, 1, <1, <1, <1, <1, 1, >=2, <1, >=2,...
## $ fast_food  <fct> 1, < 1, < 1, < 1, < 1, 0, 0, < 1, 0, < 1, 2, < 1, 1...
## $ size_food  <fct> Decreased, Decreased, Decreased, Same, Increased, S...
## $ size       <fct> NA, NA, NA, Same, Increased, Same, Increased, Same,...
## $ inc.size   <lg1> NA, NA, NA, FALSE, TRUE, FALSE, TRUE, FALSE, FALSE,...
## $ weighth_reported <fct> Decreased, Increased, Decreased, Same, Increased, I...
## $ weighth    <fct> NA, Increased, NA, Same, Increased, Increased, Incr...
## $ inc.weigth <lg1> FALSE, TRUE, FALSE, FALSE, TRUE, TRUE, TRUE, TRUE, ...
## $ Lockdown_time <fct> Más de 1 semana, Más de 2 semanas, Más de 1 semana,...
## $ gender     <fct> Masculine, Masculine, Masculine, Femenine, Femenine...
## $ age        <dbl> 23, 51, 23, 41, 44, 52, 45, 35, 45, 34, 22, 42, 63,...
## $ age_group  <chr> "18 to 29", "30 to 59", "18 to 29", "30 to 59", "30...
## $ NSE        <fct> Middle-low, Low, Middle-low, Middle-high, Middle, M...
## $ accept     <fct> Si, Si,...

```

## Exploratory analysis

### Explore Age groups

```

dat %>%
  group_by(age_group) %>%
  summarise(n = n()) %>%
  mutate(freq = n / sum(n))

```

```

## # A tibble: 3 x 3
##   age_group      n  freq
##   <chr>         <int> <dbl>

```

```
## 1 18 to 29      758 0.447
## 2 30 to 59     886 0.522
## 3 60 or older   52 0.0307
```

## Psychological variables

by NSE

```
dat %>%
  group_by(NSE) %>%
  summarise(mean(age),
            sd(age),
            mean(bai_total),
            sd(bai_total),
            mean(sh_total),
            sd(sh_total),
            n()) %>%
  ungroup()
```

```
## # A tibble: 5 x 8
##   NSE   'mean(age)' 'sd(age)' 'mean(bai_total)' 'sd(bai_total)' 'mean(sh_total)'
##   <fct>      <dbl>    <dbl>          <dbl>          <dbl>          <dbl>
## 1 Low         29.6     11.1           24.6           14.2           4.2
## 2 Midd~      31.0     10.7           18.8           13.0           3.23
## 3 Midd~      32.9     9.83           16.9           11.7           2.54
## 4 Midd~      35.2     10.4           14.4           11.4           2.15
## 5 High       39.4     9.77           12.3            9.35           2.32
## # ... with 2 more variables: 'sd(sh_total)' <dbl>, 'n()' <int>
```

by Lockdown time

```
dat %>%
  group_by(Lockdown_time) %>%
  summarise(mean(age),
            sd(age),
            mean(bai_total),
            sd(bai_total),
            mean(sh_total),
            sd(sh_total),
            n()) %>%
  ungroup()
```

```
## # A tibble: 5 x 8
##   Lockdown_time 'mean(age)' 'sd(age)' 'mean(bai_total)' 'sd(bai_total)'
##   <fct>          <dbl>    <dbl>          <dbl>          <dbl>
## 1 Más de 1 sem~  32.9     9.20           16.4           11.6
## 2 Más de 2 sem~  34.9    10.8           16.1           11.7
## 3 Más de 3 sem~  33.8    10.3           16.8           11.7
## 4 Mayor a 4 se~  31.1    10.2           17.9           13.0
## 5 No ha restri~  30.8     8.32           16.0           11.9
## # ... with 3 more variables: 'mean(sh_total)' <dbl>, 'sd(sh_total)' <dbl>,
## #   'n()' <int>
```

Table BAI categories by lockdown time, proportions and chi-square

```
prop.table(table(dat$bai_cat))
```

```
##
## Minimal Mild Moderate Severe
## 0.2535377 0.2836085 0.2358491 0.2270047
```

```
table(dat$bai_cat, dat$Lockdown_time)
```

```
##
## Más de 1 semana Más de 2 semanas Más de 3 semanas Mayor a 4 semanas
## Minimal 37 99 157 112
## Mild 50 105 198 107
## Moderate 34 86 157 99
## Severe 31 76 150 111
##
## No ha restringido el contacto social
## Minimal 25
## Mild 21
## Moderate 24
## Severe 17
```

```
prop.table(table(dat$bai_cat, dat$Lockdown_time),2)
```

```
##
## Más de 1 semana Más de 2 semanas Más de 3 semanas Mayor a 4 semanas
## Minimal 0.2434211 0.2704918 0.2371601 0.2610723
## Mild 0.3289474 0.2868852 0.2990937 0.2494172
## Moderate 0.2236842 0.2349727 0.2371601 0.2307692
## Severe 0.2039474 0.2076503 0.2265861 0.2587413
##
## No ha restringido el contacto social
## Minimal 0.2873563
## Mild 0.2413793
## Moderate 0.2758621
## Severe 0.1954023
```

```
chisq.test(table(dat$bai_cat, dat$Lockdown_time))
```

```
##
## Pearson's Chi-squared test
##
## data: table(dat$bai_cat, dat$Lockdown_time)
## X-squared = 9.6414, df = 12, p-value = 0.6474
```

Table SHAPS categories by lockdown time, proportions and chi-square

```
table(dat$sh_cat, dat$Lockdown_time)
```

```
##
##      Más de 1 semana Más de 2 semanas Más de 3 semanas Mayor a 4 semanas
## No           94           239           421           288
## Yes          58           127           241           141
##
##      No ha restringido el contacto social
## No                    57
## Yes                   30
```

```
prop.table(table(dat$sh_cat, dat$Lockdown_time),2)
```

```
##
##      Más de 1 semana Más de 2 semanas Más de 3 semanas Mayor a 4 semanas
## No      0.6184211      0.6530055      0.6359517      0.6713287
## Yes     0.3815789      0.3469945      0.3640483      0.3286713
##
##      No ha restringido el contacto social
## No                    0.6551724
## Yes                   0.3448276
```

```
chisq.test(table(dat$sh_cat, dat$Lockdown_time))
```

```
##
## Pearson's Chi-squared test
##
## data:  table(dat$sh_cat, dat$Lockdown_time)
## X-squared = 2.0877, df = 4, p-value = 0.7196
```

### Food by Psychological variables bivariate analysis

```
table(dat$pastry, dat$bai_cat)
```

```
##
##      Minimal Mild Moderate Severe
## 0           72  69           52  48
## < 1         245 226          187 172
## 1           72 121           99  90
## 2           29  52           46  51
## => 3         12  13           16  24
```

```
prop.table(table(dat$pastry, dat$bai_cat),2)
```

```
##
##      Minimal      Mild      Moderate      Severe
## 0      0.16744186 0.14345114 0.13000000 0.12467532
## < 1     0.56976744 0.46985447 0.46750000 0.44675325
## 1      0.16744186 0.25155925 0.24750000 0.23376623
## 2      0.06744186 0.10810811 0.11500000 0.13246753
## => 3     0.02790698 0.02702703 0.04000000 0.06233766
```

```
chisq.test(table(dat$pastry, dat$bai_cat))
```

```
##  
## Pearson's Chi-squared test  
##  
## data: table(dat$pastry, dat$bai_cat)  
## X-squared = 37.533, df = 12, p-value = 0.000183
```

```
table(dat$pastry, dat$bai_cat)
```

```
##  
## Minimal Mild Moderate Severe  
## 0 72 69 52 48  
## < 1 245 226 187 172  
## 1 72 121 99 90  
## 2 29 52 46 51  
## => 3 12 13 16 24
```

```
prop.table(table(dat$pastry, dat$bai_cat),2)
```

```
##  
## Minimal Mild Moderate Severe  
## 0 0.16744186 0.14345114 0.13000000 0.12467532  
## < 1 0.56976744 0.46985447 0.46750000 0.44675325  
## 1 0.16744186 0.25155925 0.24750000 0.23376623  
## 2 0.06744186 0.10810811 0.11500000 0.13246753  
## => 3 0.02790698 0.02702703 0.04000000 0.06233766
```

```
chisq.test(table(dat$pastry, dat$bai_cat))
```

```
##  
## Pearson's Chi-squared test  
##  
## data: table(dat$pastry, dat$bai_cat)  
## X-squared = 37.533, df = 12, p-value = 0.000183
```

```
table(dat$sweet_drink, dat$bai_cat)
```

```
##  
## Minimal Mild Moderate Severe  
## 1 46 58 35 37  
## 2 36 47 39 40  
## >=3 19 28 28 41  
## <1 136 151 139 137  
## 0 193 197 159 130
```

```
prop.table(table(dat$sweet_drink, dat$bai_cat),2)
```

```
##
##           Minimal      Mild  Moderate      Severe
##  1  0.10697674 0.12058212 0.08750000 0.09610390
##  2  0.08372093 0.09771310 0.09750000 0.10389610
##  >=3 0.04418605 0.05821206 0.07000000 0.10649351
##  <1  0.31627907 0.31392931 0.34750000 0.35584416
##  0  0.44883721 0.40956341 0.39750000 0.33766234
```

```
chisq.test(table(dat$sweet_drink, dat$bai_cat))
```

```
##
## Pearson's Chi-squared test
##
## data:  table(dat$sweet_drink, dat$bai_cat)
## X-squared = 24.297, df = 12, p-value = 0.01853
```

```
table(dat$sweet_drink, dat$sh_cat)
```

```
##
##           No Yes
##  1    113  63
##  2    103  59
##  >=3   65  51
##  <1   364 199
##  0    454 225
```

```
prop.table(table(dat$sweet_drink, dat$sh_cat),2)
```

```
##
##           No      Yes
##  1  0.10282075 0.10552764
##  2  0.09372157 0.09882747
##  >=3 0.05914468 0.08542714
##  <1  0.33121019 0.33333333
##  0  0.41310282 0.37688442
```

```
chisq.test(table(dat$sweet_drink, dat$sh_cat))
```

```
##
## Pearson's Chi-squared test
##
## data:  table(dat$sweet_drink, dat$sh_cat)
## X-squared = 5.3127, df = 4, p-value = 0.2567
```

```
table(dat$weighth_reported, dat$Lockdown_time)
```

```
##
##           Más de 1 semana Más de 2 semanas Más de 3 semanas Mayor a 4 semanas
## Same           72           165           282           156
## Increased       61           153           287           212
```



```
## Decreased          19          48          93          61
##
##           No ha restringido el contacto social
## Same                    33
## Increased              46
## Decreased              8
```

```
prop.table(table(dat$weigh_reported, dat$Lockdown_time),2)
```

```
##
##           Más de 1 semana Más de 2 semanas Más de 3 semanas Mayor a 4 semanas
## Same          0.47368421    0.45081967    0.42598187    0.36363636
## Increased     0.40131579    0.41803279    0.43353474    0.49417249
## Decreased     0.12500000    0.13114754    0.14048338    0.14219114
##
##           No ha restringido el contacto social
## Same                    0.37931034
## Increased              0.52873563
## Decreased              0.09195402
```

```
chisq.test(table(dat$weigh_reported, dat$Lockdown_time))
```

```
##
## Pearson's Chi-squared test
##
## data:  table(dat$weigh_reported, dat$Lockdown_time)
## X-squared = 12.275, df = 8, p-value = 0.1394
```

## PLOTS

Load packages to do plots

```
library(ggplot2)
```

```
## Warning: package 'ggplot2' was built under R version 3.6.3
```

```
library(finalfit)
```

```
## Warning: package 'finalfit' was built under R version 3.6.3
```

```
library(extrafont)
```

```
## Warning: package 'extrafont' was built under R version 3.6.2
```

```
library(patchwork)
```

```
## Warning: package 'patchwork' was built under R version 3.6.3
```

```
library(jttools)
```

```
## Warning: package 'jttools' was built under R version 3.6.3
```

Define theme

```
my_theme <- function(){  
  theme(  
    text = element_text(family = "Bookman Old Style"),  
    strip.background = element_rect(fill = "gray60",  
                                     color = "gray95"),  
    panel.background = element_blank(),  
    strip.text = element_text(color = "white"),  
    legend.title=element_text(size=9),  
    legend.text=element_text(size=8),  
  )  
}
```

Box Plots

```
box1 <- ggplot(dat, aes(NSE, bai_total, fill = frit_dic))+  
  geom_boxplot(alpha = 0.2)+  
  geom_violin(alpha = 0.5)+  
  labs(y = "Anxiety",  
       x = " ",  
       fill = "Fried food consume")+  
  my_theme()
```

```
box2 <- ggplot(dat, aes(NSE, bai_total, fill = pastry_dic))+  
  geom_boxplot(alpha = 0.2)+  
  geom_violin(alpha = 0.5)+  
  labs(y = "Anxiety",  
       x = "Socioeconomic level reported",  
       fill = "pastry consume")+  
  my_theme()
```

Paste boxplots

box1 / box2

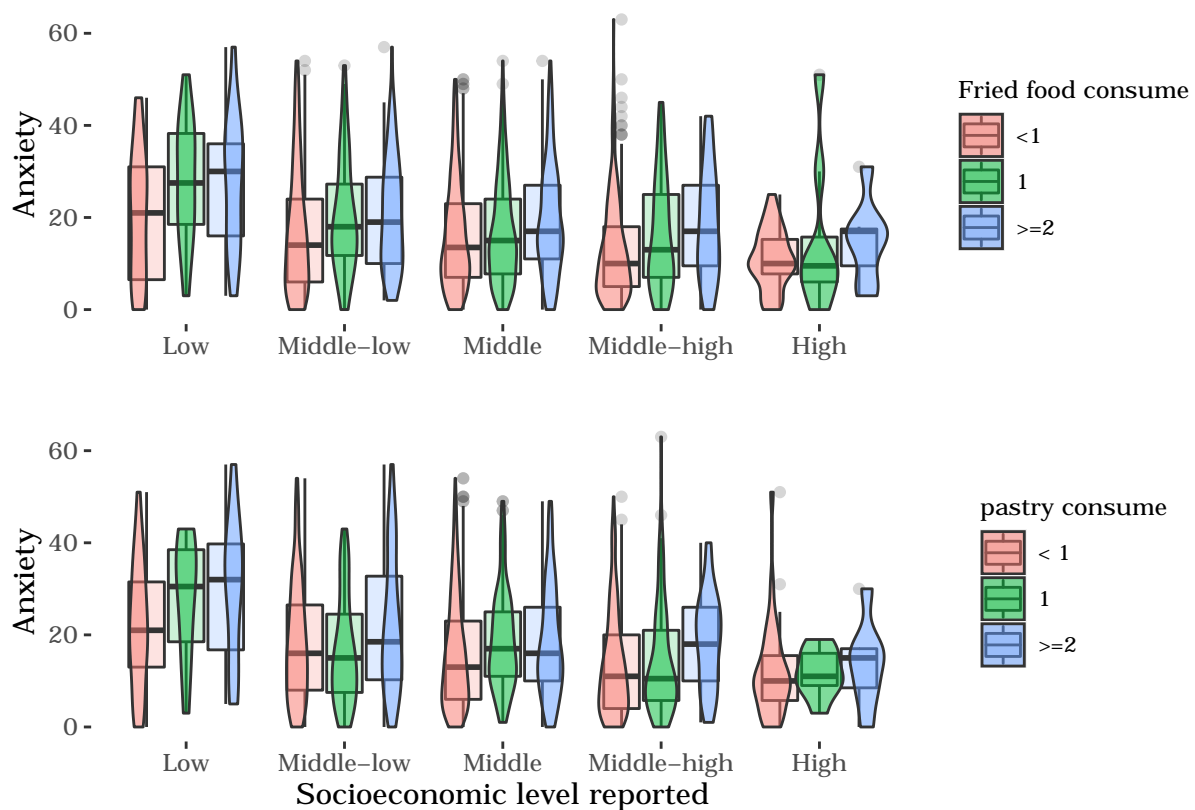

## OR PLOT

Put labs in variable to do OR plots

```
library(expss)
```

```
## Warning: package 'expss' was built under R version 3.6.3
```

```
var_lab(dat$gender) <- "Gender"  
var_lab(dat$weighth_reported) <- "Body Weight"  
var_lab(dat$size_food) <- "Food serving size"  
var_lab(dat$sweet_drink) <- "Sugar-sweetened beverage"  
var_lab(dat$pastry_dic) <- "Pastry"  
var_lab(dat$frit_dic) <- "Fried Food"  
var_lab(dat$fast_food) <- "Fast/Junk Food"  
var_lab(dat$bai_cat) <- "Anxiety (BAI)"  
var_lab(dat$sh_cat) <- "Anhedonia (SHAPS)"  
var_lab(dat$NSE) <- "Socioeconomic Status"
```

or\_plot1 Figure 3

```

explanatory = c("gender", "NSE", "pastry_dic", "sweet_drink", "frit_dic", "fast_food",
               "weigh_reported",
               "bai_cat", "sh_cat")

dependent = "inc.size"
dat %>%
  or_plot(dependent, explanatory,
          table_text_size=3, title_text_size=12,
          dependent_label = "Dependent Variable: Increased food serving size",
          suffix = " ",
          plot_opts=list(xlab("OR, 95% CI"),
                        theme(axis.title = element_text(size=12),
                              axis.text.x = element_text(size=8))
          )
  )
)

```

## Warning: Removed 9 rows containing missing values (geom\_errorbarh).

### Dependent Variable: Increased food serving size

|                          |             |                           |
|--------------------------|-------------|---------------------------|
| Gender                   | Femenine    | 0.85 (0.61–1.18, p=0.332) |
|                          | Masculine   | –                         |
| Socioeconomic Status     | Low         | –                         |
|                          | Middle–low  | 0.70 (0.33–1.47, p=0.350) |
|                          | Middle      | 0.60 (0.29–1.22, p=0.164) |
|                          | Middle–high | 0.56 (0.26–1.16, p=0.123) |
|                          | High        | 0.36 (0.13–0.99, p=0.052) |
| Pastry                   | < 1         | –                         |
|                          | 1           | 1.47 (1.10–1.96, p=0.008) |
|                          | >=2         | 1.86 (1.31–2.67, p=0.001) |
| Sugar–sweetened beverage | 1           | –                         |
|                          | 2           | 0.78 (0.46–1.35, p=0.379) |
|                          | >=3         | 0.67 (0.37–1.21, p=0.185) |
|                          | <1          | 0.99 (0.65–1.52, p=0.973) |
|                          | 0           | 0.98 (0.64–1.51, p=0.940) |
| Fried Food               | <1          | –                         |
|                          | 1           | 1.22 (0.90–1.66, p=0.198) |
|                          | >=2         | 1.24 (0.88–1.77, p=0.223) |
| Fast/Junk Food           | 0           | –                         |
|                          | < 1         | 1.12 (0.82–1.52, p=0.476) |
|                          | 1           | 1.02 (0.58–1.78, p=0.954) |
|                          | 2           | 1.06 (0.37–3.39, p=0.913) |
|                          | => 3        | 1.56 (0.48–5.72, p=0.471) |
| Body Weight              | Same        | –                         |
|                          | Increased   | 5.31 (4.14–6.85, p<0.001) |
|                          | Decreased   | 0.59 (0.33–1.01, p=0.064) |
| Anxiety (BAI)            | Minimal     | –                         |
|                          | Mild        | 1.54 (1.10–2.16, p=0.011) |
|                          | Moderate    | 2.07 (1.46–2.95, p<0.001) |
|                          | Severe      | 2.21 (1.53–3.19, p<0.001) |
| Anhedonia (SHAPS)        | No          | –                         |
|                          | Yes         | 1.39 (1.08–1.79, p=0.010) |

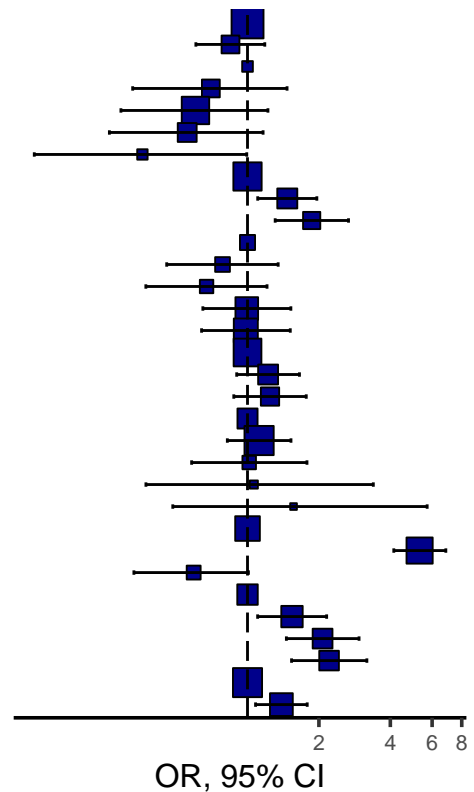

summary logistic model or\_plot1

```

mod1 <- glm(inc.size ~ gender + NSE + pastry_dic + sweet_drink + frit_dic + fast_food +
            weigh_reported + bai_cat + sh_cat, dat, family = "binomial")

summary(mod1)

```

```

##
## Call:
## glm(formula = inc.size ~ gender + NSE + pastry_dic + sweet_drink +
##      frit_dic + fast_food + weigth_reported + bai_cat + sh_cat,
##      family = "binomial", data = dat)
##
## Deviance Residuals:
##      Min       1Q   Median       3Q      Max
## -1.9951  -0.8100  -0.5167   0.9006   2.2449
##
## Coefficients:
##              Estimate Std. Error z value Pr(>|z|)
## (Intercept)    -1.520775   0.452260  -3.363 0.000772 ***
## genderMasculine -0.165198   0.170446  -0.969 0.332438
## NSEMiddle-low  -0.355872   0.381064  -0.934 0.350361
## NSEMiddle      -0.505089   0.362678  -1.393 0.163722
## NSEMiddle-high -0.585483   0.379285  -1.544 0.122673
## NSEHigh        -1.020198   0.524581  -1.945 0.051801 .
## pastry_dic1     0.386058   0.146327   2.638 0.008332 **
## pastry_dic>=2   0.622817   0.181452   3.432 0.000598 ***
## sweet_drink2    -0.242581   0.275795  -0.880 0.379093
## sweet_drink>=3 -0.397518   0.299744  -1.326 0.184777
## sweet_drink<1  -0.007261   0.217706  -0.033 0.973394
## sweet_drink0    -0.016559   0.219464  -0.075 0.939855
## frit_dic1       0.199766   0.155290   1.286 0.198302
## frit_dic>=2     0.218303   0.179255   1.218 0.223287
## fast_food< 1    0.112314   0.157422   0.713 0.475560
## fast_food1      0.016393   0.285260   0.057 0.954175
## fast_food2      0.060992   0.555633   0.110 0.912592
## fast_food=> 3   0.446742   0.620320   0.720 0.471414
## weigth_reportedIncreased 1.670240   0.128773  12.970 < 2e-16 ***
## weigth_reportedDecreased -0.522795   0.282096  -1.853 0.063846 .
## bai_catMild     0.431812   0.170800   2.528 0.011466 *
## bai_catModerate 0.728472   0.179809   4.051 5.09e-05 ***
## bai_catSevere   0.791634   0.186333   4.248 2.15e-05 ***
## sh_catYes       0.328807   0.127862   2.572 0.010123 *
## ---
## Signif. codes:  0 '***' 0.001 '**' 0.01 '*' 0.05 '.' 0.1 ' ' 1
##
## (Dispersion parameter for binomial family taken to be 1)
##
##      Null deviance: 2026.9  on 1482  degrees of freedom
## Residual deviance: 1644.6  on 1459  degrees of freedom
## (213 observations deleted due to missingness)
## AIC: 1692.6
##
## Number of Fisher Scoring iterations: 4

```

213 observations deleted due to missingness are “decreased” size\_food cases. Because model is comparing increased over mantaneid.

```
sum(is.na(dat$inc.size))
```

```
## [1] 213
```

```
table(dat$size_food, dat$inc.size)
```

```
##
##           FALSE TRUE
## Same      845    0
## Increased    0  638
## Decreased    0    0
```

```
table(dat$size_food)
```

```
##
## Same Increased Decreased
##   845      638      213
```

or\_plot2 figure 4

```
explanatory = c("gender", "NSE", "pastry_dic", "sweet_drink", "frit_dic", "fast_food",
               "size_food", "bai_cat", "sh_cat")
```

```
dependent = "inc.weigth"
```

```
dat %>%
```

```
  or_plot(dependent, explanatory,
           table_text_size=3, title_text_size=12,
           dependent_label = "Dependent Variable: Increased Weight reported",
           suffix = " ",
           plot_opts=list(xlab("OR, 95% CI"),
                          theme(axis.title = element_text(size=12),
                                axis.text.x = element_text(size=8))
           )
)
```

```
## Warning: Removed 9 rows containing missing values (geom_errorbarh).
```

Dependent Variable: Increased Weight reported

|                          |             |                            |   |
|--------------------------|-------------|----------------------------|---|
| Gender                   | Feminine    |                            |   |
|                          | Masculine   | 0.87 (0.64–1.19, p=0.397)  | – |
| Socioeconomic Status     | Low         |                            | – |
|                          | Middle–low  | 1.15 (0.57–2.29, p=0.699)  |   |
|                          | Middle      | 1.11 (0.57–2.13, p=0.763)  |   |
|                          | Middle–high | 0.99 (0.49–1.97, p=0.971)  |   |
| Pastry                   | High        | 1.04 (0.40–2.62, p=0.940)  |   |
|                          | < 1         |                            | – |
| Sugar–sweetened beverage | 1           | 1.41 (1.06–1.86, p=0.017)  |   |
|                          | >=2         | 1.49 (1.05–2.13, p=0.027)  |   |
| Fried Food               | 2           | 1.55 (0.92–2.61, p=0.097)  |   |
|                          | >=3         | 1.61 (0.91–2.85, p=0.105)  |   |
|                          | < 1         | 0.91 (0.60–1.37, p=0.646)  |   |
| Fast/Junk Food           | 0           | 1.03 (0.68–1.55, p=0.892)  |   |
|                          | < 1         |                            | – |
| Food serving size        | 1           | 0.83 (0.62–1.11, p=0.219)  |   |
|                          | >=2         | 1.21 (0.86–1.71, p=0.262)  |   |
| Anxiety (BAI)            | 0           |                            | – |
|                          | < 1         | 1.54 (1.16–2.06, p=0.003)  |   |
|                          | 1           | 1.56 (0.90–2.70, p=0.113)  |   |
|                          | 2           | 4.37 (1.35–17.77, p=0.022) |   |
| Anhedonia (SHAPS)        | => 3        | 3.24 (0.84–16.56, p=0.114) |   |
|                          | Same        |                            | – |
| Anxiety (BAI)            | Increased   | 5.76 (4.53–7.35, p<0.001)  |   |
|                          | Decreased   | 0.22 (0.13–0.36, p<0.001)  |   |
| Anhedonia (SHAPS)        | Minimal     |                            | – |
|                          | Mild        | 1.27 (0.93–1.74, p=0.132)  |   |
|                          | Moderate    | 1.32 (0.94–1.84, p=0.104)  |   |
| Anhedonia (SHAPS)        | Severe      | 1.81 (1.28–2.56, p=0.001)  |   |
|                          | No          |                            | – |
| Anhedonia (SHAPS)        | Yes         | 1.33 (1.05–1.70, p=0.020)  |   |

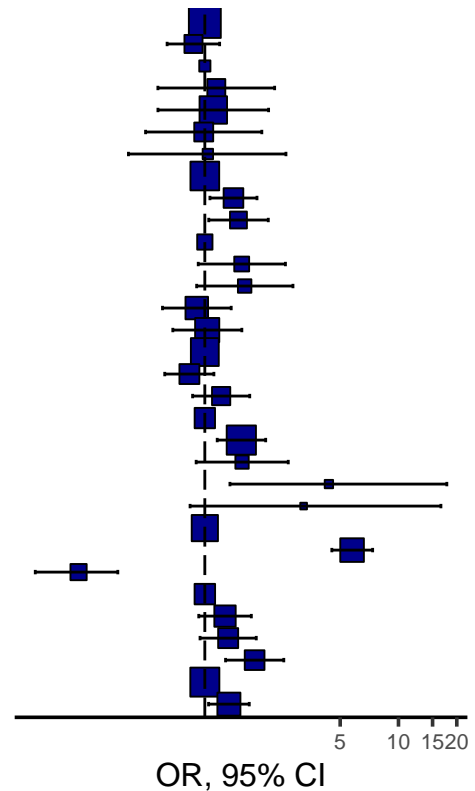

summary model figure 4

```
mod2 <- glm( inc.weigth ~ gender + NSE + pastry_dic + sweet_drink + frit_dic + fast_food +
             bai_cat + sh_cat, dat, family = "binomial")
```

```
summary(mod2)
```

```
##
## Call:
## glm(formula = inc.weigth ~ gender + NSE + pastry_dic + sweet_drink +
##      frit_dic + fast_food + bai_cat + sh_cat, family = "binomial",
##      data = dat)
##
## Deviance Residuals:
##      Min       1Q   Median       3Q      Max
## -2.164  -1.023  -0.727   1.144   1.991
##
## Coefficients:
##              Estimate Std. Error z value Pr(>|z|)
## (Intercept)  -1.507347  0.362691  -4.156 3.24e-05 ***
## genderMasculine -0.215171  0.142397  -1.511 0.130773
## NSEMiddle-low  0.202070  0.304802   0.663 0.507360
## NSEMiddle     0.140254  0.287624   0.488 0.625811
## NSEMiddle-high 0.009671  0.303640   0.032 0.974592
## NSEHigh       -0.031939  0.423410  -0.075 0.939870
## pastry_dic1   0.588463  0.126346   4.658 3.20e-06 ***
```

```

## pastry_dic>=2    0.770316    0.159686    4.824 1.41e-06 ***
## sweet_drink2    0.294314    0.232971    1.263 0.206479
## sweet_drink>=3  0.281706    0.259342    1.086 0.277375
## sweet_drink<1  -0.035634    0.183416   -0.194 0.845955
## sweet_drink0    0.056171    0.183779    0.306 0.759877
## frit_dic1      -0.120388    0.131606   -0.915 0.360318
## frit_dic>=2    0.259007    0.153858    1.683 0.092294 .
## fast_food< 1   0.474876    0.131404    3.614 0.000302 ***
## fast_food1     0.557823    0.251992    2.214 0.026853 *
## fast_food2     1.512098    0.583413    2.592 0.009547 **
## fast_food=> 3   1.535466    0.686475    2.237 0.025303 *
## bai_catMild    0.366558    0.144184    2.542 0.011013 *
## bai_catModerate 0.446753    0.151484    2.949 0.003186 **
## bai_catSevere  0.765564    0.156878    4.880 1.06e-06 ***
## sh_catYes      0.337016    0.109079    3.090 0.002004 **
## ---
## Signif. codes:  0 '***' 0.001 '**' 0.01 '*' 0.05 '.' 0.1 ' ' 1
##
## (Dispersion parameter for binomial family taken to be 1)
##
## Null deviance: 2332.4 on 1695 degrees of freedom
## Residual deviance: 2160.1 on 1674 degrees of freedom
## AIC: 2204.1
##
## Number of Fisher Scoring iterations: 4

```

## Additional analysis with continus psychological variables

### Descriptive tables

```

dat %>%
  group_by(gender) %>%
  summarise(mean(bai_total),sd(bai_total),
            mean(sh_total), sd(sh_total)) %>%
  ungroup()

```

```

## # A tibble: 2 x 5
##   gender 'mean(bai_total)' 'sd(bai_total)' 'mean(sh_total)' 'sd(sh_total)'
##   <fct>      <dbl>          <dbl>          <dbl>          <dbl>
## 1 Feminine      17.6            12.2            2.56           3.54
## 2 Masculine     13.3            10.9            2.97           3.92

```

```

dat %>%
  group_by(NSE) %>%
  summarise(mean(bai_total),sd(bai_total),
            mean(sh_total), sd(sh_total)) %>%
  ungroup()

```

```

## # A tibble: 5 x 5
##   NSE      'mean(bai_total)' 'sd(bai_total)' 'mean(sh_total)' 'sd(sh_total)'
##   <fct>      <dbl>          <dbl>          <dbl>          <dbl>

```



```
## 1 Low                24.6          14.2          4.2          4.27
## 2 Middle-low         18.8          13.0          3.23         4.03
## 3 Middle             16.9          11.7          2.54         3.58
## 4 Middle-high       14.4          11.4          2.15         3.07
## 5 High               12.3          9.35          2.32         3.13
```

```
dat %>%
  group_by(size_food) %>%
  summarise(mean(bai_total),sd(bai_total),
            mean(sh_total), sd(sh_total)) %>%
  ungroup()
```

```
## # A tibble: 3 x 5
##   size_food 'mean(bai_total)' 'sd(bai_total)' 'mean(sh_total)' 'sd(sh_total)'
##   <fct>      <dbl>          <dbl>          <dbl>          <dbl>
## 1 Same      14.3            11.2            2.24           3.53
## 2 Increased 20.0            12.4            3.08           3.69
## 3 Decreased 17.5            12.3            2.85           3.51
```

```
dat %>%
  group_by(weigh_reported) %>%
  summarise(mean(bai_total),sd(bai_total),
            mean(sh_total), sd(sh_total)) %>%
  ungroup()
```

```
## # A tibble: 3 x 5
##   weigh_reported 'mean(bai_total)' 'sd(bai_total)' 'mean(sh_total)'
##   <fct>          <dbl>          <dbl>          <dbl>
## 1 Same          14.0           10.6           2.11
## 2 Increased     19.5           12.5           3.11
## 3 Decreased     16.9           12.9           2.66
## # ... with 1 more variable: 'sd(sh_total)' <dbl>
```

## Plots

```
ggplot(dat, aes(bai_total, sh_total, color = gender))+
  geom_point()+
  geom_smooth(method = "lm", aes(color = gender))+
  labs(x = "BAI total Score",
       y = "SHAPS Total Score")+
  my_theme()
```

```
## 'geom_smooth()' using formula 'y ~ x'
```

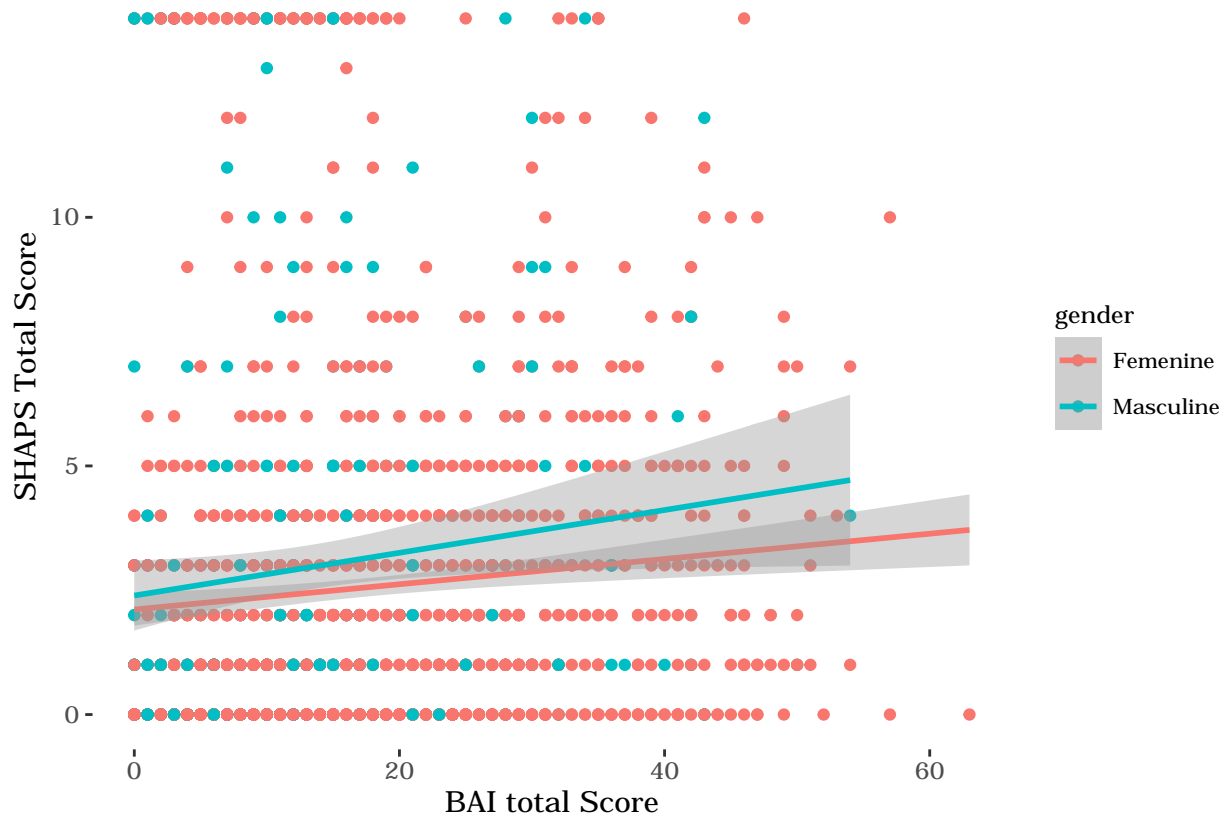

Bai by nutritional variables groups

```
library(ggribes)
```

```
## Warning: package 'ggribes' was built under R version 3.6.3
```

```
ggplot(dat, aes(bai_total, sweet_drink))+
  geom_density_ridges()+
  my_theme()
```

```
## Picking joint bandwidth of 3.65
```

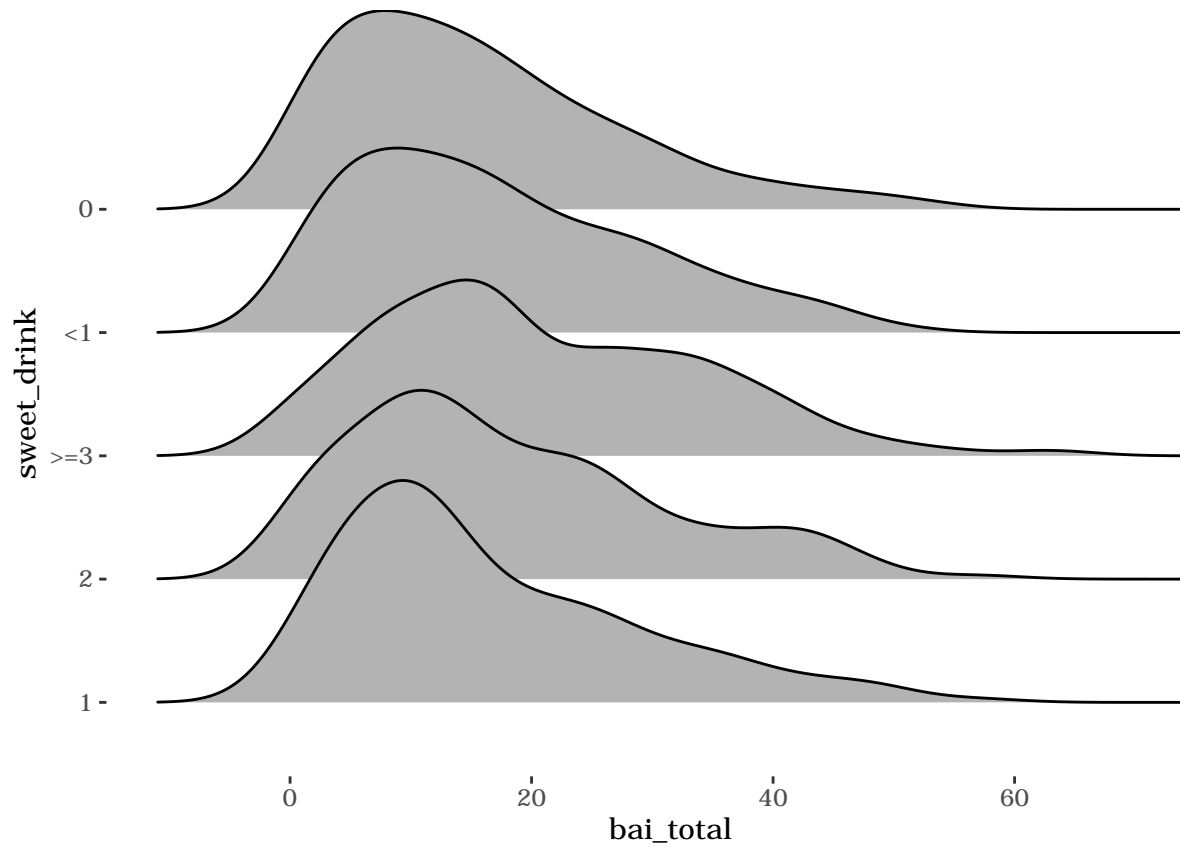

```
ggplot(dat, aes(bai_total, pastry))+  
  geom_density_ridges()+  
  my_theme()
```

```
## Picking joint bandwidth of 3.76
```

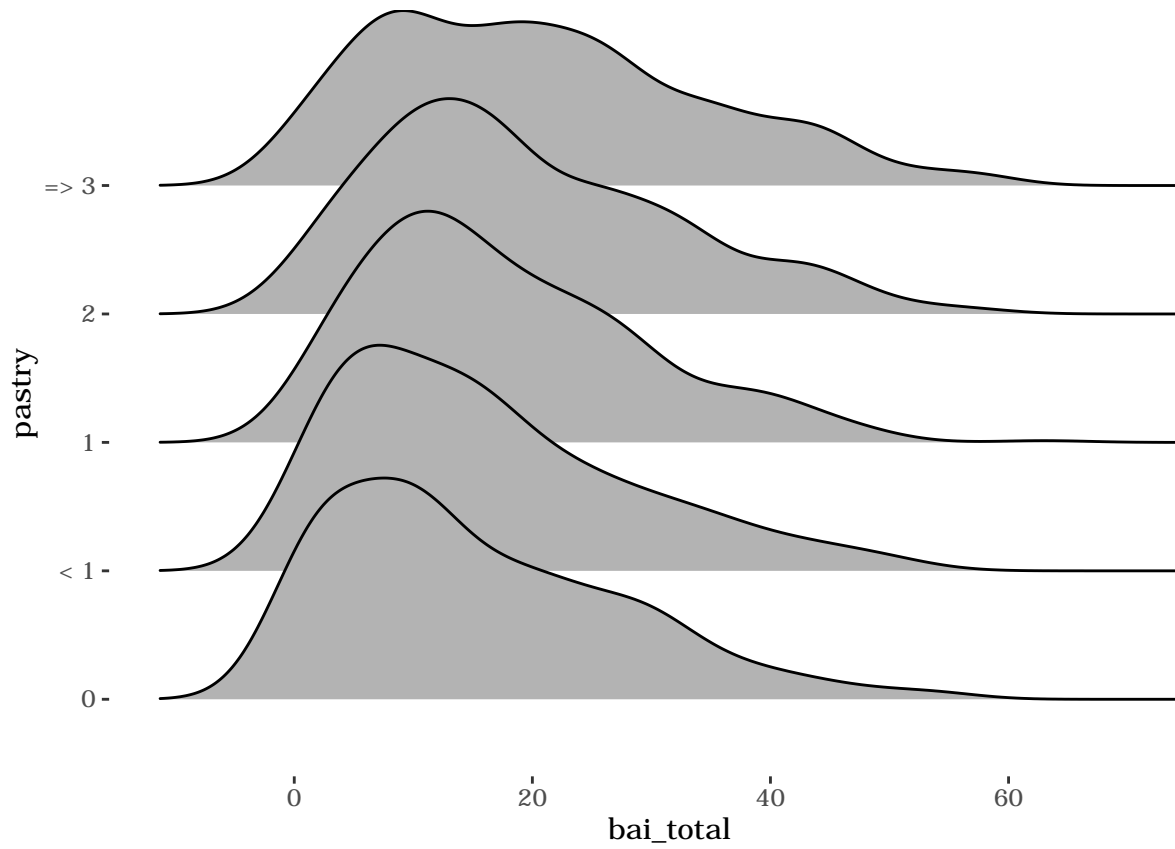

```
ggplot(dat, aes(bai_total, frit))+  
  geom_density_ridges()+  
  my_theme()
```

```
## Picking joint bandwidth of 3.63
```

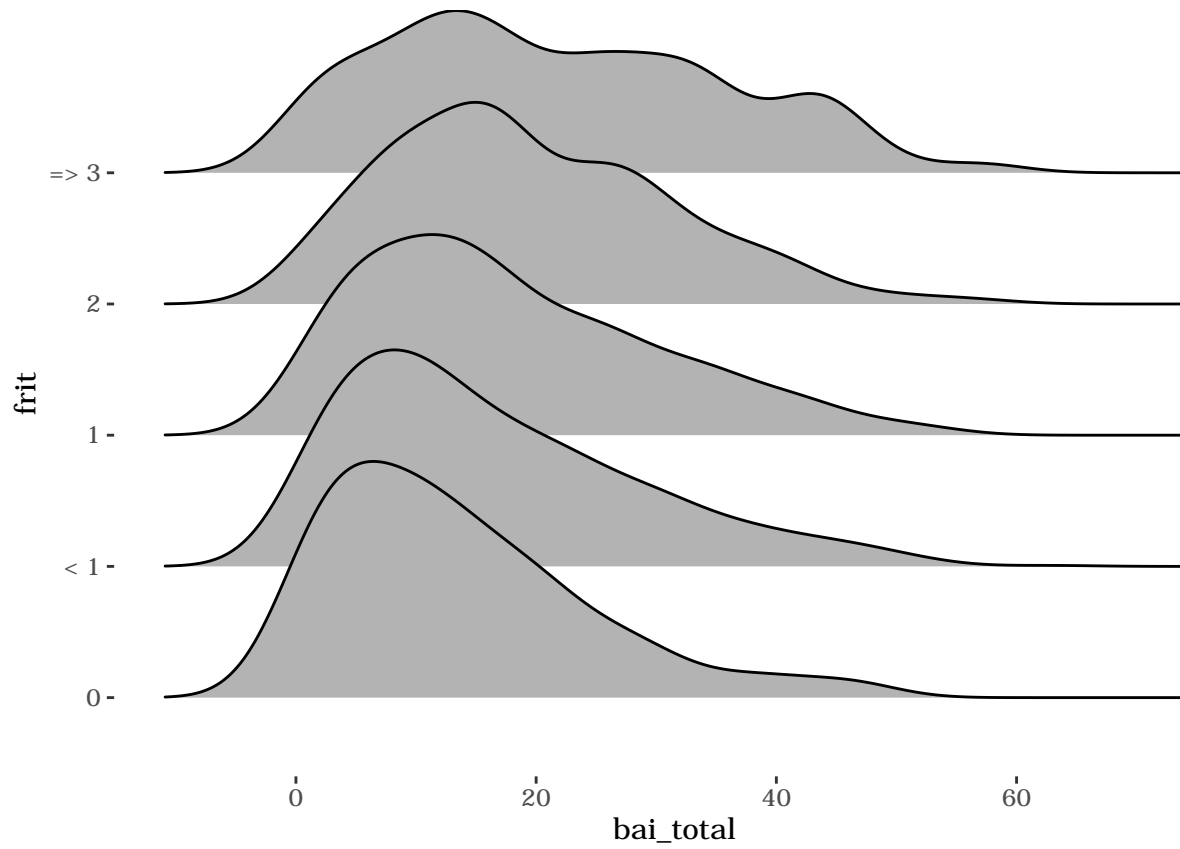

```
ggplot(dat, aes(bai_total, fast_food))+  
  geom_density_ridges()+  
  my_theme()
```

```
## Picking joint bandwidth of 4.96
```

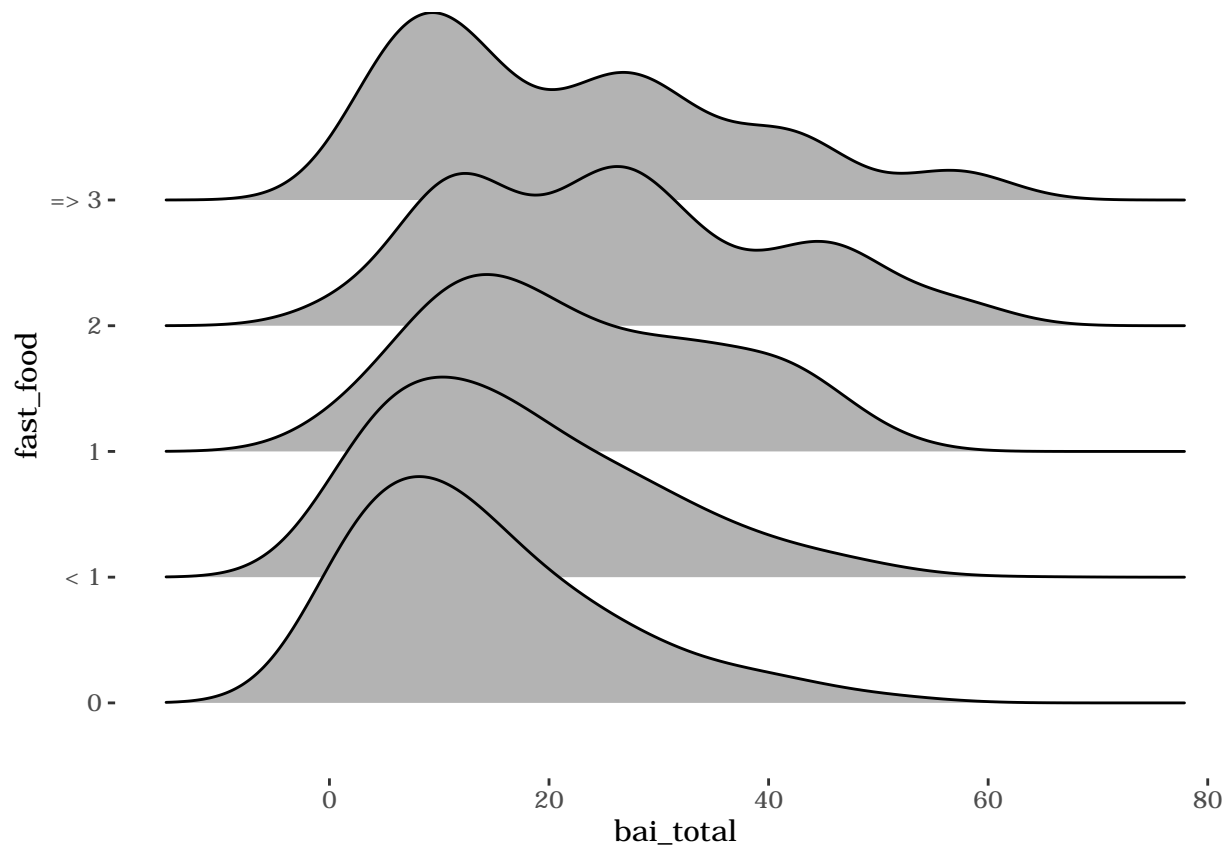

### SH by nutritional variables groups

```
ggplot(dat, aes(sh_total, sweet_drink))+
  geom_density_ridges()+
  my_theme()
```

```
## Picking joint bandwidth of 0.857
```

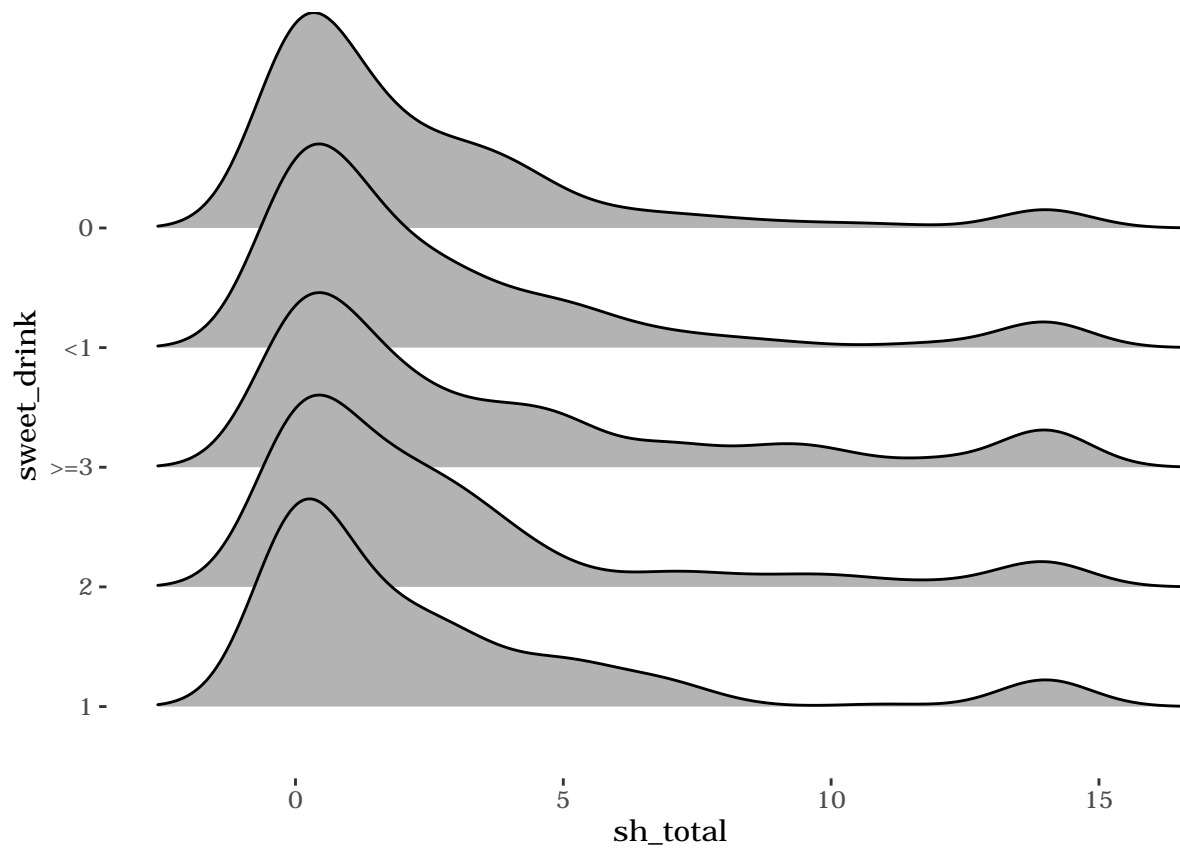

```
ggplot(dat, aes(sh_total, pastry))+  
  geom_density_ridges()+  
  my_theme()
```

```
## Picking joint bandwidth of 0.872
```

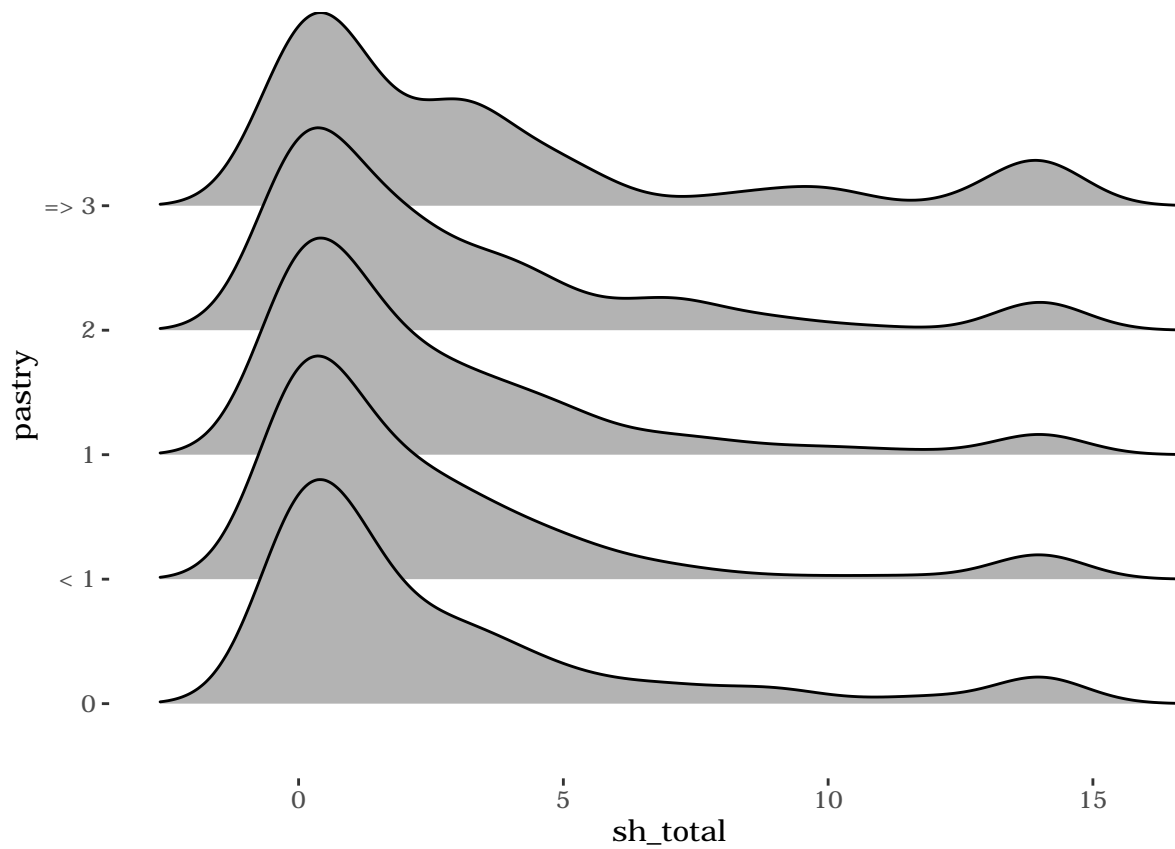

```
ggplot(dat, aes(sh_total, frit))+  
  geom_density_ridges()+  
  my_theme()
```

```
## Picking joint bandwidth of 0.909
```



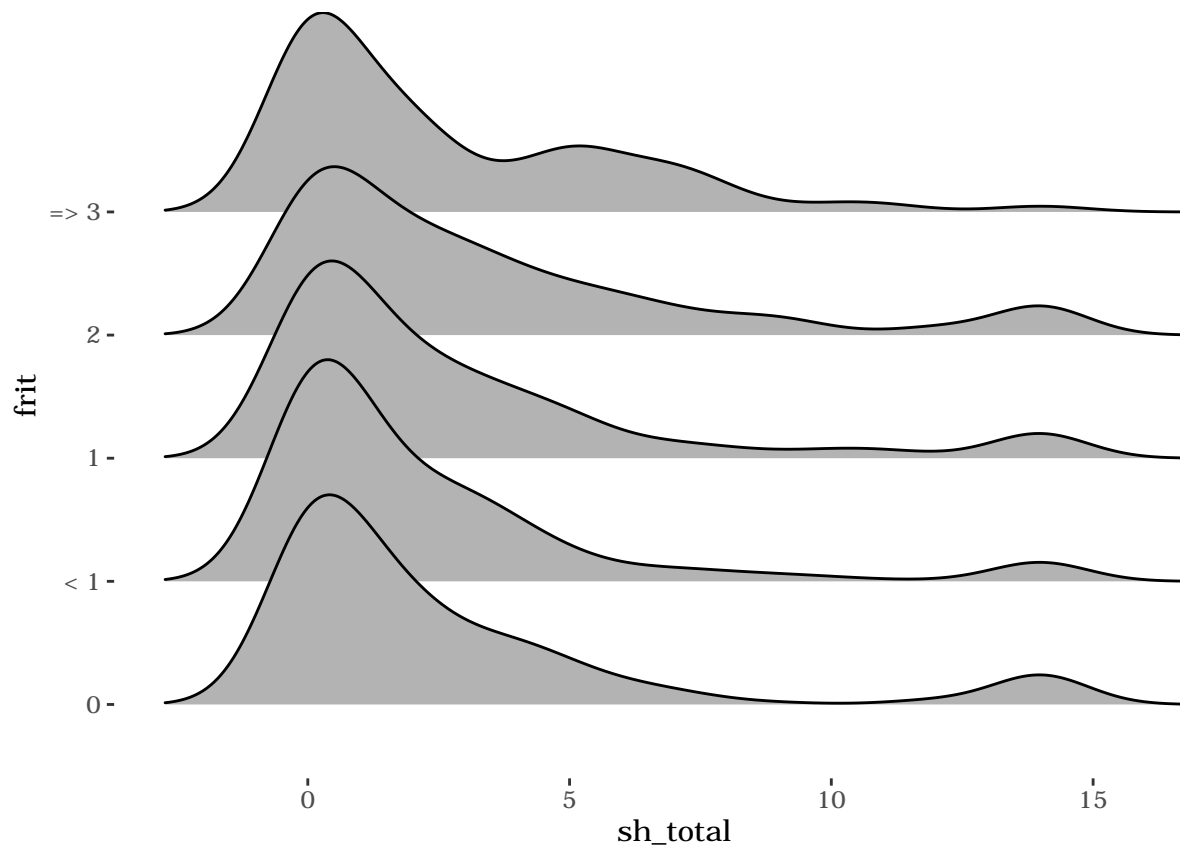

```
ggplot(dat, aes(sh_total, fast_food))+  
  geom_density_ridges()+  
  my_theme()
```

```
## Picking joint bandwidth of 1.36
```

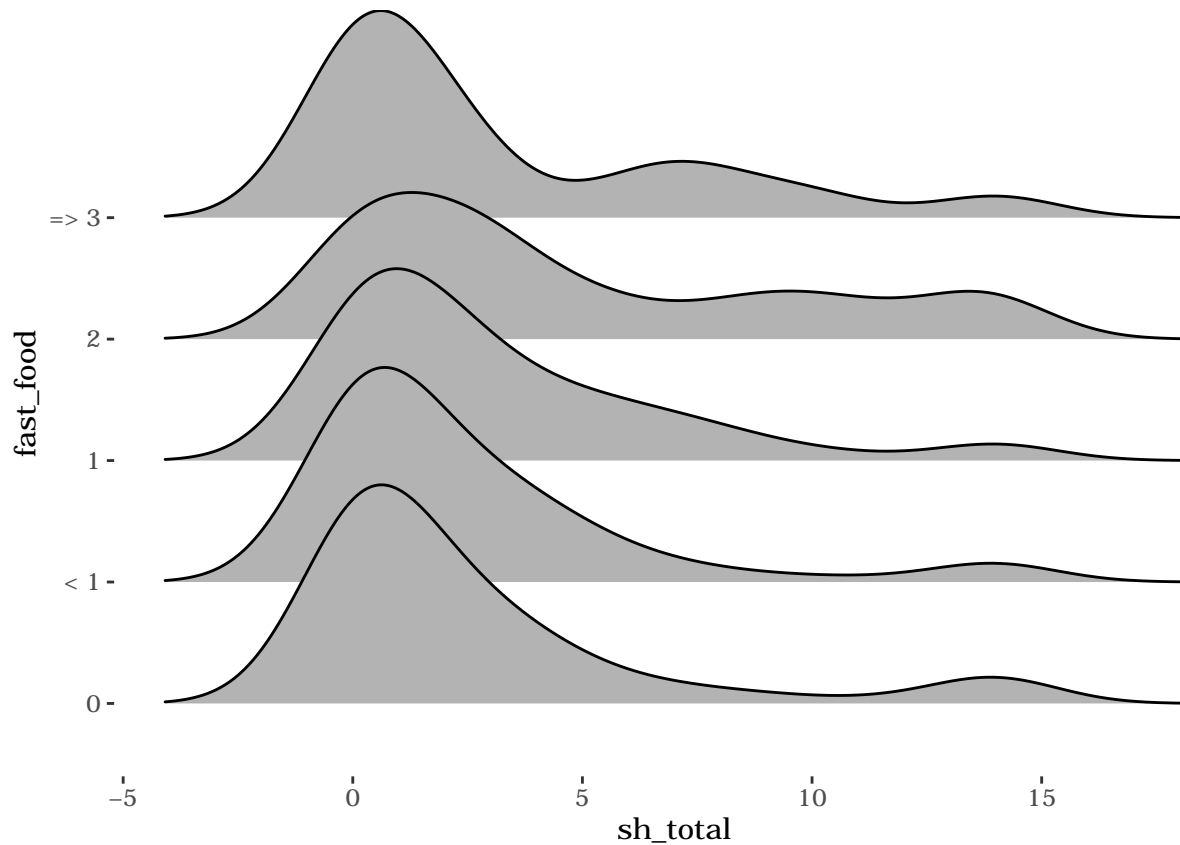

## models with continus psychological variable

Dependent variable = Increased or not food serving size

```
mod3 <- glm(inc.size ~ gender + NSE + pastry_dic + sweet_drink + frit_dic + fast_food +
            weigth_reported + bai_total + sh_total, dat, family = "binomial")
```

```
summary(mod3)
```

```
##
## Call:
## glm(formula = inc.size ~ gender + NSE + pastry_dic + sweet_drink +
##      frit_dic + fast_food + weigth_reported + bai_total + sh_total,
##      family = "binomial", data = dat)
##
## Deviance Residuals:
##      Min       1Q   Median       3Q      Max
## -2.2926  -0.7882  -0.5401   0.9151   2.1513
##
## Coefficients:
##              Estimate Std. Error z value Pr(>|z|)
## (Intercept)  -1.4930325  0.4531349  -3.295 0.000985 ***
## genderMasculine -0.1565097  0.1695592  -0.923 0.355987
## NSEMiddle-low  -0.3302974  0.3833445  -0.862 0.388897
```

```

## NSEMiddle          -0.4543192  0.3653825  -1.243  0.213718
## NSEMiddle-high    -0.5337457  0.3819669  -1.397  0.162305
## NSEHigh           -0.9499346  0.5256986  -1.807  0.070763 .
## pastry_dic1       0.4130451  0.1458552   2.832  0.004627 **
## pastry_dic>=2     0.6484000  0.1818107   3.566  0.000362 ***
## sweet_drink2      -0.2428261  0.2756123  -0.881  0.378295
## sweet_drink>=3    -0.4273114  0.3012235  -1.419  0.156020
## sweet_drink<1     0.0004771  0.2171724   0.002  0.998247
## sweet_drink0      -0.0064984  0.2188016  -0.030  0.976306
## frit_dic1         0.1896454  0.1545877   1.227  0.219905
## frit_dic>=2       0.2419571  0.1784567   1.356  0.175153
## fast_food< 1      0.1067016  0.1571933   0.679  0.497270
## fast_food1        -0.0003983  0.2866477  -0.001  0.998891
## fast_food2        -0.0218598  0.5625881  -0.039  0.969005
## fast_food=> 3      0.3358292  0.6224402   0.540  0.589517
## weigth_reportedIncreased 1.6478785  0.1288942  12.785 < 2e-16 ***
## weigth_reportedDecreased -0.5749123  0.2820697  -2.038  0.041531 *
## bai_total          0.0268362  0.0053644   5.003  5.66e-07 ***
## sh_total           0.0286499  0.0169484   1.690  0.090947 .
## ---
## Signif. codes:  0 '***' 0.001 '**' 0.01 '*' 0.05 '.' 0.1 ' ' 1
##
## (Dispersion parameter for binomial family taken to be 1)
##
## Null deviance: 2026.9 on 1482 degrees of freedom
## Residual deviance: 1648.4 on 1461 degrees of freedom
## (213 observations deleted due to missingness)
## AIC: 1692.4
##
## Number of Fisher Scoring iterations: 4

```

Dependent variable = Increased body Weigth or not

```

mod4 <- glm( inc.weigth ~ gender + NSE + pastry_dic + sweet_drink + frit_dic + fast_food +
             bai_total + sh_total, dat, family = "binomial")

```

```
summary(mod4)
```

```

##
## Call:
## glm(formula = inc.weigth ~ gender + NSE + pastry_dic + sweet_drink +
##      frit_dic + fast_food + bai_total + sh_total, family = "binomial",
##      data = dat)
##
## Deviance Residuals:
##      Min       1Q   Median       3Q      Max
## -2.2325  -1.0210  -0.7158   1.1450   2.0214
##
## Coefficients:
##              Estimate Std. Error z value Pr(>|z|)
## (Intercept)  -1.665046  0.365790  -4.552 5.32e-06 ***
## genderMasculine -0.204536  0.142705  -1.433 0.151779
## NSEMiddle-low  0.239257   0.306198   0.781 0.434579

```

```

## NSEmiddle      0.211513   0.289175   0.731 0.464513
## NSEmiddle-high 0.099398   0.305757   0.325 0.745114
## NSEHigh        0.063550   0.423725   0.150 0.880780
## pastry_dic1    0.606461   0.126448   4.796 1.62e-06 ***
## pastry_dic>=2  0.785354   0.160446   4.895 9.84e-07 ***
## sweet_drink2   0.288418   0.234108   1.232 0.217953
## sweet_drink>=3 0.240104   0.261023   0.920 0.357647
## sweet_drink<1 -0.038759   0.184347  -0.210 0.833471
## sweet_drink0   0.066264   0.184693   0.359 0.719762
## frit_dic1     -0.133937   0.132162  -1.013 0.310856
## frit_dic>=2    0.259633   0.153976   1.686 0.091758 .
## fast_food< 1   0.485936   0.132153   3.677 0.000236 ***
## fast_food1     0.552665   0.253168   2.183 0.029036 *
## fast_food2     1.468835   0.588744   2.495 0.012601 *
## fast_food=> 3   1.504809   0.688671   2.185 0.028882 *
## bai_total      0.025509   0.004521   5.642 1.68e-08 ***
## sh_total       0.058439   0.014559   4.014 5.97e-05 ***
## ---
## Signif. codes:  0 '***' 0.001 '**' 0.01 '*' 0.05 '.' 0.1 ' ' 1
##
## (Dispersion parameter for binomial family taken to be 1)
##
## Null deviance: 2332.4 on 1695 degrees of freedom
## Residual deviance: 2147.9 on 1676 degrees of freedom
## AIC: 2187.9
##
## Number of Fisher Scoring iterations: 4

```

## Comparison between models categorial vs continus psychologcal variables

Dependent variable = Increased food serving size

```
anova(mod1, mod3, test='LR')
```

```

## Analysis of Deviance Table
##
## Model 1: inc.size ~ gender + NSE + pastry_dic + sweet_drink + frit_dic +
##   fast_food + weigth_reported + bai_cat + sh_cat
## Model 2: inc.size ~ gender + NSE + pastry_dic + sweet_drink + frit_dic +
##   fast_food + weigth_reported + bai_total + sh_total
##   Resid. Df Resid. Dev Df Deviance Pr(>Chi)
## 1      1459      1644.6
## 2      1461      1648.4 -2   -3.8216   0.148

```

```
AIC(mod1, mod3)
```

```

##      df      AIC
## mod1 24 1692.604
## mod3 22 1692.425

```

```
BIC(mod1, mod3)
```

```
##      df      BIC
## mod1 24 1819.847
## mod3 22 1809.065
```

Dependent variable = Weigth reported

```
anova(mod2, mod4, test='LR')
```

```
## Analysis of Deviance Table
##
## Model 1: inc.weigth ~ gender + NSE + pastry_dic + sweet_drink + frit_dic +
##      fast_food + bai_cat + sh_cat
## Model 2: inc.weigth ~ gender + NSE + pastry_dic + sweet_drink + frit_dic +
##      fast_food + bai_total + sh_total
##  Resid. Df Resid. Dev Df Deviance Pr(>Chi)
## 1      1674      2160.1
## 2      1676      2147.9 -2    12.244
```

```
AIC(mod2, mod4)
```

```
##      df      AIC
## mod2 22 2204.106
## mod4 20 2187.862
```

```
BIC(mod2, mod4)
```

```
##      df      BIC
## mod2 22 2323.699
## mod4 20 2296.583
```
